# Supplementary material for: Carbon-depleted outer core revealed by sound velocity measurements of liquid iron–carbon alloy
Source: PubMed Central journal article supplement (PMC4673837; doi:10.1038/ncomms9942), 2015-11-24
Supplement: ncomms9942-s1.pdf [file ncomms9942-s1.pdf]

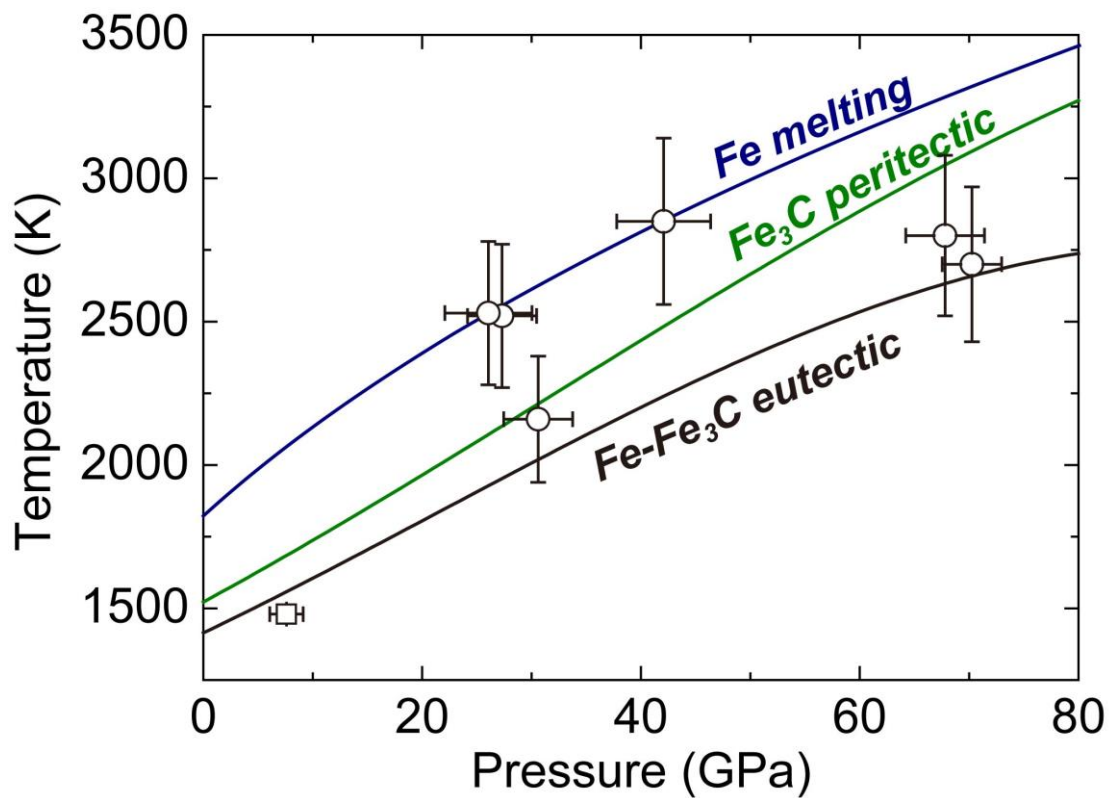

**Supplementary Figure 1 | Pressure and temperature conditions of the present experiments.** Circle (LH-DAC) and square (EH-DAC) symbols denote the present experimental conditions. Curves show the melting temperatures of pure Fe (blue)<sup>1</sup> and Fe<sub>3</sub>C (green)<sup>2</sup> and the eutectic temperature in the Fe-Fe<sub>3</sub>C binary system (black)<sup>2</sup>.

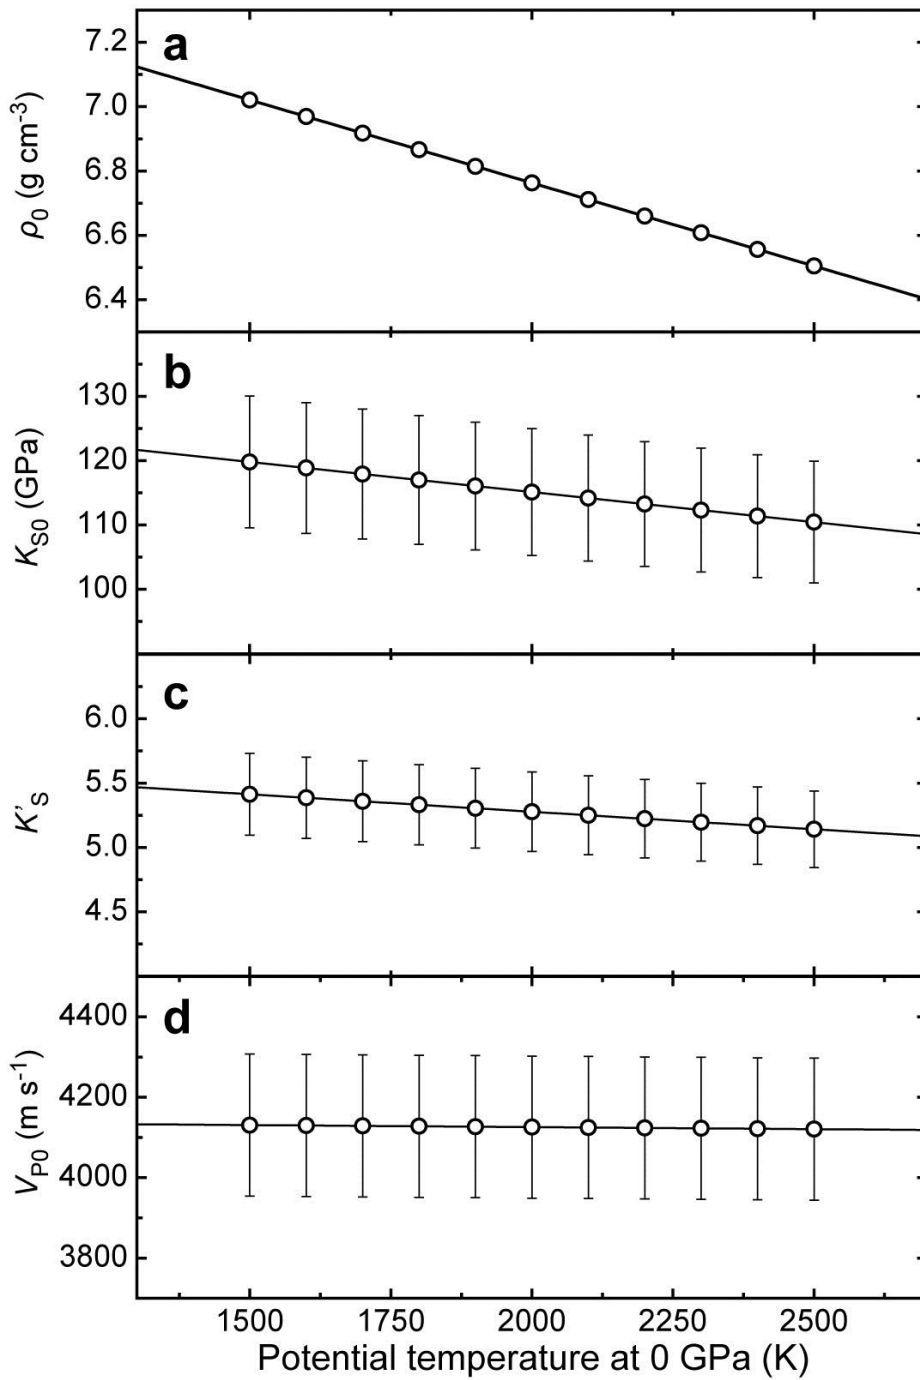

**Supplementary Figure 2 | Changes in parameters of the Murnaghan EoS obtained by fitting with a variety of temperature at 1 bar. a,** The density at ambient pressure is from ref. 3. The  $V_P$  at 1 bar is calculated from  $K_{S0}$  and  $\rho_0$ .

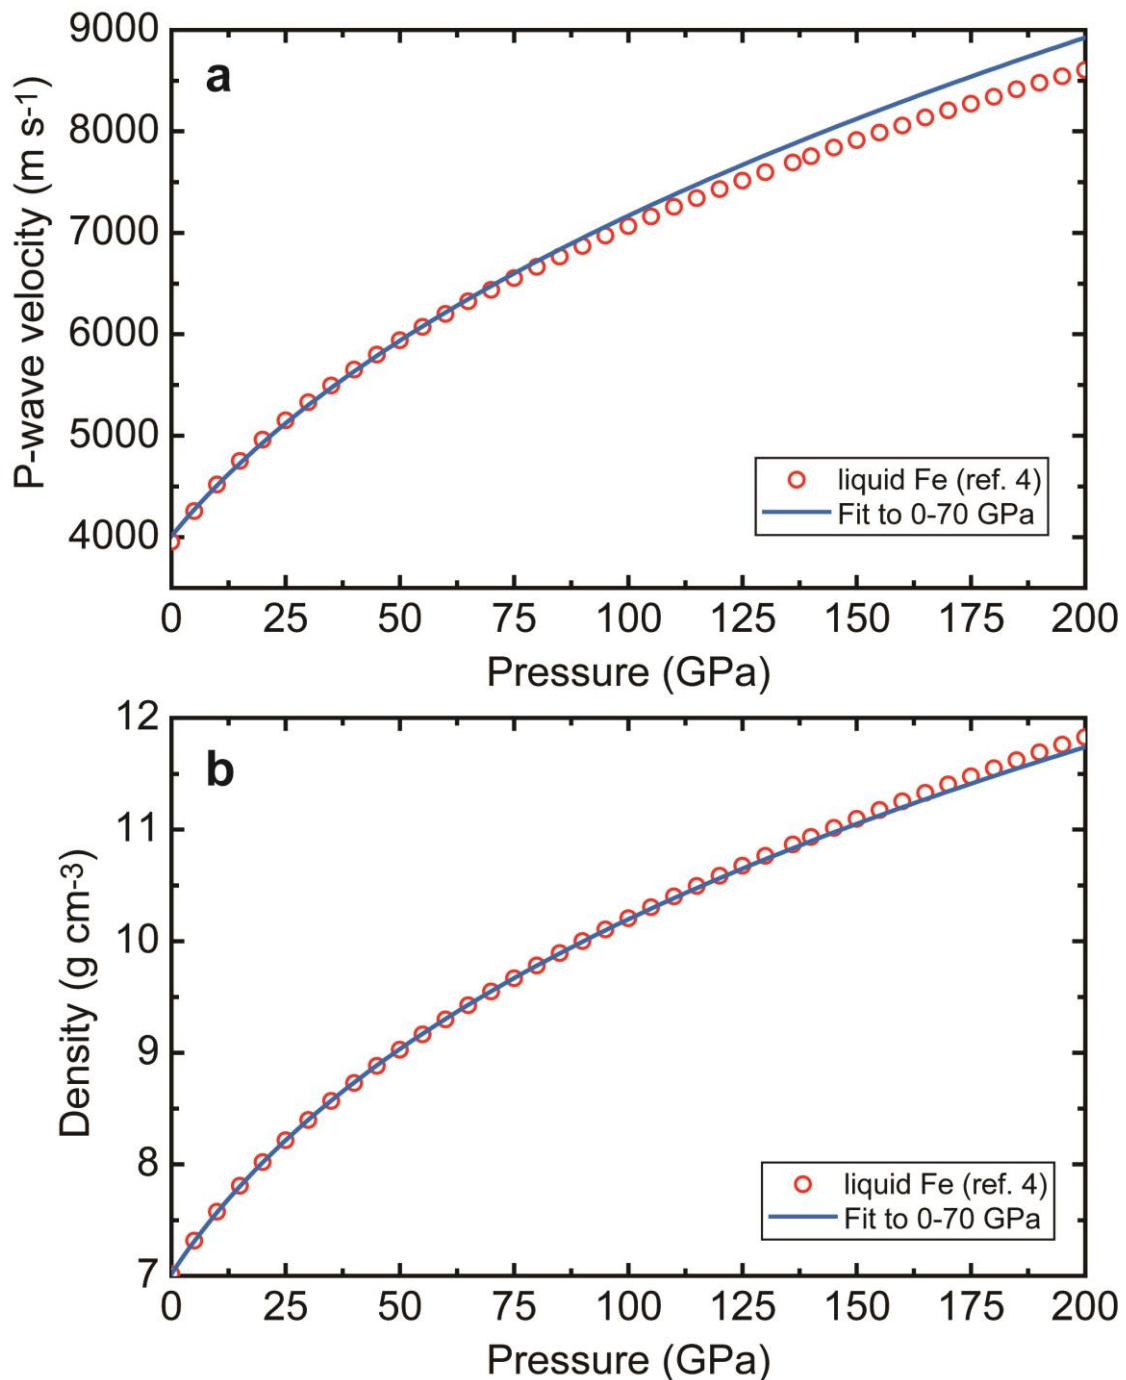

**Supplementary Figure 3 | Validity of extrapolation using Murnaghan EoS.**

The red symbols represent the velocity (a) and density (b) of liquid Fe along adiabatic compression with  $T_0 = 1811$  K based on the 4th-order Birch-Murnaghan EoS<sup>4</sup>. The extrapolation of the Murnaghan EoS based on fitting to data for 0–70 GPa range (green curve) slightly overestimates the velocity at the core pressure range. See Supplementary Note 1 for details.

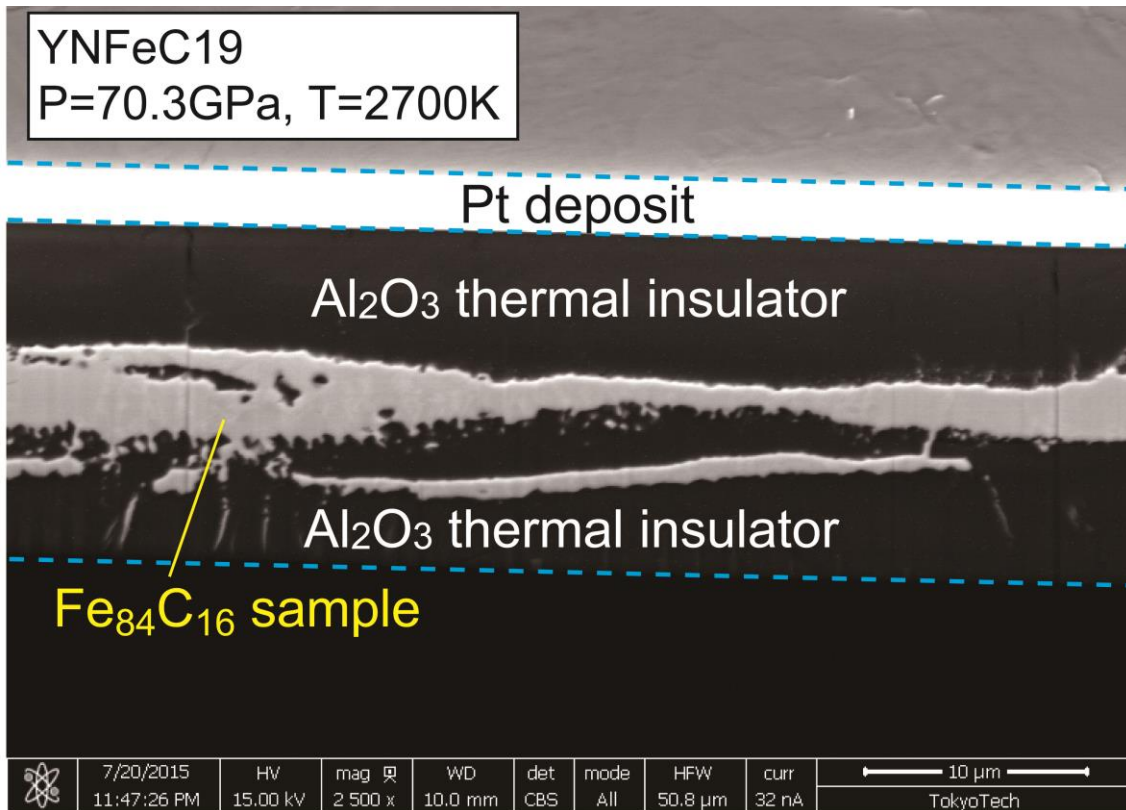

**Supplementary Figure 4 | Back-scattered electron image of a sample recovered from 70 GPa and 2700 K.** A recovered sample was polished parallel to the compression, laser-heating, and X-ray beam direction using focused ion beam (FIB) instrument. Though a part of liquid sample was penetrated into sapphire thermal insulators, most of sample was kept by sapphire insulators during the heating experiment.

**Supplementary Table 1 | Experimental results.**

| Run no. | $P$ (GPa) | $T$ (K)   | $V_P$ (m s <sup>-1</sup> )<br>Linear fit* | $V_P$ (m s <sup>-1</sup> )<br>Sine fit* |
|---------|-----------|-----------|-------------------------------------------|-----------------------------------------|
| FeC08   | 7.6(1.5)  | 1480(20)  | 4592(154)                                 | 4766(155)                               |
| FeC12   | 27.3(3.2) | 2520(250) | 5511(225)                                 | 5660(209)                               |
| FeC13   | 26.1(4.0) | 2530(250) | 5763(263)                                 | 5938(155)                               |
| FeC14   | 42.1(4.3) | 2850(290) | 6485(202)                                 | 7169(204)                               |
| FeC17   | 67.8(3.6) | 2800(280) | 7313(261)                                 | 7611(209)                               |
| FeC18   | 30.6(3.1) | 2160(220) | 6097(294)                                 | 6127(204)                               |
| FeC19   | 70.3(2.7) | 2700(270) | 7283(287)                                 | 7771(465)                               |

\*The sound velocity of liquid Fe<sub>84</sub>C<sub>16</sub> was obtained by linear fit to IXS data. The results of sine fit are for comparison. See Methods for the details.

**Supplementary Table 2 | EoS parameters for liquid Fe<sub>84</sub>C<sub>16</sub>.**

| $T_0$ (K) | $\rho_0$ (g cm <sup>-3</sup> )* | $K_{S0}$ (GPa) | $K'_{S0}$ |
|-----------|---------------------------------|----------------|-----------|
| 2500      | 6.505                           | 110(9)         | 5.14(30)  |
| 2000      | 6.763                           | 115(10)        | 5.28(31)  |
| 1500      | 7.021                           | 120(10)        | 5.41(32)  |

\*The density for liquid Fe<sub>84</sub>C<sub>16</sub> at 1 bar obtained from ref. 3.

### **Supplementary Note 1: Validity of data extrapolation to core pressures**

Our measurements were performed up to 70 GPa and extrapolated to core pressures based on the Murnaghan EoS (see Methods), which considers a simple linear relation between adiabatic bulk modulus and pressure. The validity of such an approximation needs to be verified when we make a large extrapolation<sup>5</sup>. Here we fit the Murnaghan EoS to the limited ranges of  $P$ - $V_P$  data (0–70 GPa) for liquid Fe, which are given by the 4th order Birch-Murnaghan EoS along adiabatic temperature profile with  $T_0 = 1811$  K (ref. 4), and then extrapolate to 200 GPa (Supplementary Fig. 3). With fitting parameters same as those obtained for  $V_P$ , the density profile is also extrapolated.

We found that the extrapolation of low-pressure (0–70 GPa) data to higher pressure using the Murnaghan EoS overestimates the  $V_P$  by 1.5% at 100 GPa and 3.7% at 200 GPa. In contrast, it underestimates the density only by 0.1% at 100 GPa and 0.8% at 200 GPa. It is therefore possible that the present extrapolation of the  $V_P$  data of liquid  $\text{Fe}_{84}\text{C}_{16}$  measured up to 70 GPa leads to an overestimation of  $V_P$  by 2–4% at the core pressure range (>136 GPa). In addition to the uncertainties of the present EoS parameters (Supplementary Table 2), we incorporated those over- or under-estimations as the uncertainty in the present estimate of carbon abundance in the core. For the static error calculations, a tradeoff between  $K_{S0}$  and  $K'_{S0}$  was considered.

### Supplementary References:

1. Anzellini, S., Dewaele, A., Mezouar, M., Loubeyre, P. & Morard, G. Melting of iron at Earth's inner core boundary based on fast X-ray diffraction. *Science* **340**, 464–466 (2013).
2. Fei, Y. & Brosh, E. Experimental study and thermodynamic calculations of phase relations in the Fe-C system at high pressure. *Earth Planet. Sci. Lett.* **408**, 155–162 (2014).
3. Ogino, K., Nishiwaki, A. & Hosotani, Y. Density of molten Fe-C alloys. *J. Jpn. Inst. Met.* **48**, 1004–1010 (1984).
4. Anderson, W. W. & Ahrens, T. J. An equation of state for liquid iron and implications for the Earth's core. *J. Geophys. Res.* **99**, 4273–4284 (1994).
5. Stacey, F. D. & Davis, P. M. High pressure equations of state with applications to the lower mantle and core. *Phys. Earth Planet. Inter.* **142**, 137–184 (2004).
